# Supplementary material
Source: Springer Nature journal article supplement (https://publikationen.ub.uni-frankfurt.de/opus4/files/35269/13104_2014_3224_MOESM4_ESM.pdf)
Supplement: MOESM4 [file 13104_2014_3224_MOESM4_ESM.pdf]

**Suppl. Table 3A.** ABCB1 expression in melanoma cells and the influence of the ABCB1 inhibitor PGP4008 (2.5 $\mu$ M) on the concentration of the ABCB1 substrate vincristine that decreases the viability of melanoma cells by 50% (IC<sub>50</sub>).

| Cell line | BRAF status | ABCB1 expression |                  | IC <sub>50</sub> vincristine (ng/ml) |                                                        |                    |
|-----------|-------------|------------------|------------------|--------------------------------------|--------------------------------------------------------|--------------------|
|           |             |                  | RFU <sup>1</sup> |                                      | + PGP4008                                              | fold sensitisation |
| IPC298    | wild-type   | yes              | 27 $\pm$ 9       | 2.74 $\pm$ 0.39                      | 0.75 $\pm$ 0.42 <sup>2</sup> (79 $\pm$ 3) <sup>3</sup> | 3.65               |
| SK-MEL-30 | wild-type   | yes              | 88 $\pm$ 15      | 4.57 $\pm$ 1.49                      | 0.92 $\pm$ 0.33 <sup>2</sup> (91 $\pm$ 10)             | 4.99               |

<sup>1</sup> RFU, relative fluorescence units

<sup>2</sup> P < 0.05 relative to vincristine alone

<sup>3</sup> cell viability (% non-treated control) in the presence of PGP4008 alone

**Suppl. Table 3B.** ABCC1 expression in melanoma cells and the influence of the ABCC1 inhibitor MK571 (10  $\mu$ M) on the concentration of the ABCC1 substrate vincristine that decreases the viability of melanoma cells by 50% (IC<sub>50</sub>).

| Cell line | BRAF status | ABCC1 expression |                  | IC <sub>50</sub> vincristine (ng/ml) |                                                         |                    |
|-----------|-------------|------------------|------------------|--------------------------------------|---------------------------------------------------------|--------------------|
|           |             |                  | RFU <sup>1</sup> |                                      | + MK571                                                 | fold sensitisation |
| IPC298    | wild-type   | yes              | 476 $\pm$ 46     | 2.74 $\pm$ 0.39                      | 1.09 $\pm$ 0.39 <sup>2</sup> (92 $\pm$ 16) <sup>3</sup> | 2.52               |
| SK-MEL-30 | wild-type   | yes              | 1656 $\pm$ 133   | 4.57 $\pm$ 1.49                      | 2.59 $\pm$ 0.55 <sup>2</sup> (98 $\pm$ 15)              | 1.76               |

<sup>1</sup> RFU, relative fluorescence units

<sup>2</sup> P < 0.05 relative to vincristine alone

<sup>3</sup> cell viability (% non-treated control) in the presence of MK571 alone

**Suppl. Table 3C.** ABCG2 expression in melanoma cells and the influence of the ABCG2 inhibitor fumitremorgin C (10  $\mu$ M) on the concentration of the ABCG2 substrate mitoxantrone that decreases the viability of melanoma cells by 50% (IC<sub>50</sub>).

| Cell line | BRAF status | ABCG2 expression |                  | IC <sub>50</sub> mitoxantrone (ng/ml) |                                                        |                    |
|-----------|-------------|------------------|------------------|---------------------------------------|--------------------------------------------------------|--------------------|
|           |             |                  | RFU <sup>1</sup> |                                       | + fumitremorgin C                                      | fold sensitisation |
| IPC298    | wild-type   | yes              | 175 $\pm$ 14     | 1.54 $\pm$ 0.45                       | 0.96 $\pm$ 0.19 <sup>2</sup> (83 $\pm$ 9) <sup>3</sup> | 1.61               |
| SK-MEL-30 | wild-type   | yes              | 68 $\pm$ 6       | 3.44 $\pm$ 0.44                       | 2.21 $\pm$ 0.34 <sup>2</sup> (80 $\pm$ 8)              | 1.56               |

<sup>1</sup> RFU, relative fluorescence units

<sup>2</sup> P < 0.05 relative to mitoxantrone alone

<sup>3</sup> cell viability (% non-treated control) in the presence of fumitremorgin C alone
